# Supplementary material
Source: PubMed Central journal article supplement (PMC4934760)
Supplement: JVI.03216-15_zjv999181674so1.pdf [file JVI.03216-15_zjv999181674so1.pdf]

## Supplementary Data

**Table A1. Primers used in this study.**

| Construct/Gene Name                         | Primer Name   | 5'-3' sequence                 |
|---------------------------------------------|---------------|--------------------------------|
| <b>Y2H</b>                                  |               |                                |
| pGBKT7-Nsp9                                 | BamHINsp9-F   | TAATGGATCCAAGGAGCAGTGTTTAAACTG |
|                                             | PstINsp9-R    | TAATCTGCAGCTCATGATTGGATCTGAGT  |
| pGADT7-N                                    | EcoRIN-F      | TAATGAATTCCCAAATAACAACGGCAAG   |
|                                             | BamHIN-R      | TAATGGATCCTTACGCTGATGATGGCGT   |
| pGBKT7-Nsp9 <sub>1-180</sub>                | BamHINsp9-F   | TAATGGATCCAAGGAGCAGTGTTTAAACTG |
|                                             | PstINsp9-R1   | TAATCTGCAGGCTTCCAGTGTCACTGGG   |
| pGBKT7-Nsp9 <sub>181-452</sub>              | BamHINsp9-F2  | TAATGGATCCCAGTGCACGCGGCTGCC    |
|                                             | PstINsp9-R3   | TAATCTGCAGGCCACCTCTCTTAGTTACTG |
| pGBKT7-Nsp9 <sub>453-646</sub>              | BamHINsp9-F4  | TAATGGATCCTGTCGTCTGGCGACCCG    |
|                                             | PstINsp9-R    | TAATCTGCAGCTCATGATTGGATCTGAGT  |
| pGBKT7-Nsp9 <sub>1-452</sub>                | BamHINsp9-F   | TAATGGATCCAAGGAGCAGTGTTTAAACTG |
|                                             | PstINsp9-R3   | TAATCTGCAGGCCACCTCTCTTAGTTACTG |
| pGBKT7-Nsp9 <sub>181-646</sub>              | BamHINsp9-F2  | TAATGGATCCCAGTGCACGCGGCTGCC    |
|                                             | PstINsp9-R    | TAATCTGCAGCTCATGATTGGATCTGAGT  |
| pGBKT7-Nsp9 <sub>453-551</sub>              | BamHINsp9-F4  | TAATGGATCCTGTCGTCTGGCGACCCG    |
|                                             | PstINsp9-R4   | TAATCTGCAGGCGAGTCTGTTATGGCTGTC |
| pGBKT7-Nsp9 <sub>552-646</sub>              | BamHINsp9-F5  | TGCTGGATCCCATCATTTCTAGGCTGTAGG |
|                                             | PstINsp9-R    | TAATCTGCAGCTCATGATTGGATCTGAGT  |
| pGBKT7-Nsp9 <sub>552-598</sub>              | BamHINsp9-F5  | TGCTGGATCCCATCATTTCTAGGCTGTAGG |
|                                             | PstINsp9-R5   | TAATCTGCAGGGTCCATGAGTATCGCAGCC |
| pGBKT7-Nsp9 <sub>599-646</sub>              | BamHINsp9-F6  | TTATGGATCCTGAGCTGTGCTTGTTTAGAG |
|                                             | PstINsp9-R    | TAATCTGCAGCTCATGATTGGATCTGAGT  |
| <b>BiFC</b>                                 |               |                                |
| pBiFC-N-VC155                               | EcoRIN-F      | TAATGAATTCCCAAATAACAACGGCAAG   |
|                                             | XhoIN-R       | TAATCTCGAGACGCTGATGATGGCGCT    |
| pBiFC-Nsp9-VN                               | HindIIINSP9-F | TTGTAAGCTTGGAGCAGTGTTTAAACTG   |
|                                             | SalINSP9-R    | TTGTGTCGACCTCATGATTGGATCTGAG   |
| <b>Pull-down</b>                            |               |                                |
| pTriEx-Nsp9 <sub>NVSL97-7895</sub>          | NcoINsp9-F    | TTGTCCATGGGAGCAGTGTTTAAACTG    |
|                                             | XhoINsp9-R    | TTGTCTCGAGCTCATGATTGGATCTGAG   |
| pGEX-TEV-N <sub>NVSL97-7895</sub>           | BamHIN-F      | TAATGGATCCCCAAATAACAACGGCAAG   |
|                                             | EcoRIN-R      | TAATGAATTCTTACGCTGATGATGGCGCT  |
| pTriEx-Nsp9 <sub>TA-12</sub>                | NcoINsp9-F    | TCTTCCATGGCATTAAACTGCTAGCCGCC  |
|                                             | XhoINsp9-R    | TTGTCTCGAGCTCATGATTGGATCTGAG   |
| pGEX-TEV-N <sub>TA-12</sub>                 | BamHIN-F      | TAATGGATCCCCAAATAACAACGGCAAG   |
|                                             | EcoRIN-R      | TCGTGAATTCTCATGCTGAGGGTGTGCTG  |
| pTriEx-Nsp9 <sub>O10u91</sub>               | EcoRINsp9-F   | TGGCGAATTCTACAGGCTTTAAACTGCTAG |
|                                             | HindIIINsp9-R | GGCGAAGCTTTTCATTGTGACTTTTCAGT  |
| pGEX-TEV-N <sub>O10u91</sub>                | BamHIN-F      | TAATGGATCCGCCGGTAAAAACCAGAGCC  |
|                                             | EcoRIN-R      | TGATGAATTCTTAGCTTGCACCCTGACTGG |
| <b>CoIP</b>                                 |               |                                |
| PTriEx-Nsp9 <sub>599-646(NVSL97-7895)</sub> | NcoINsp9His-F | TAGTCCATGGGAAGCTGTGCTTGTTTAGAG |
|                                             | XhoINsp9-R    | TTGTCTCGAG CTCATGATTGGATCTGAG  |

|                                          |               |                                                      |
|------------------------------------------|---------------|------------------------------------------------------|
| pTriEx-N-GFP <sub>(NVSL97-7895)</sub>    | NcoIN-F       | TAATCCATGGCACCAAATAACAACGGCAAGC                      |
|                                          | BamHIN-R      | TAATGGATCCCGCTGATGATGGCGCTGTG                        |
| PTriEx-Nsp9 <sub>596-643(TA-12)</sub>    | NcoINsp9-F    | TAGTCCATGGCAAGCTGTGCTTGTTTAGAG                       |
|                                          | XhoINsp9-R    | TGCTCTCGAGTCATGATTGGACCTGAGTTTC                      |
| pTriEx-N-GFP <sub>(TA-12)</sub>          | NcoIN-F       | TAATCCATGGCACCAAATAACAACGGCAAGC                      |
|                                          | BamHIN-R      | TAATGGATCCCTGCTGAGGGTGATGCTGTG                       |
| PTriEx-Nsp9 <sub>598-645 (Olot/91)</sub> | NcoINsp9-F    | TTCTCCATGGCATGTGCTTGCATTGACCATGAC                    |
|                                          | XhoINsp9-R    | TGCCCTCGAGTTCATTGTGACTTTTCAGT                        |
| pTriEx-N-GFP <sub>(Olot/91)</sub>        | NcoIN-F       | TAGTCCATGGCCGGTAAAAACCAGAGCC                         |
|                                          | BamHIN-R      | TAATGGATCCCGCTTGCACCCTGACTGGCG                       |
| <b>Mutagenesis (Y2H)</b>                 |               |                                                      |
| pGBKT7-Nsp9 <sub>L603A</sub>             | BamHIL603A-F  | TAATGGATCCCTAGCTGTGCTTGTGCAGAGTATGATC                |
| pGBKT7-Nsp9 <sub>E646A</sub>             | PstIE646A-R   | TCGTCTGCAGGTGCATGATTGGATCTGAG                        |
| pGBKT7-Nsp9 <sub>K640A</sub>             | PstIK640A-R   | TCGTCTGCAGGCTCATGATTGGATCTGAGTGCTTCCCAC              |
| pGBKT7-Nsp9 <sub>E639A</sub>             | PstIE639A-R   | TCGTCTGCAGGCTCATGATTGGATCTGAGTTTTGCCACAT<br>G        |
| pGBKT7-Nsp9 <sub>S636A</sub>             | Nsp9S636A-F   | CGTTCTTCTTGGCCATGTGGGAAAAACTC                        |
|                                          | Nsp9S636A-R   | GAGTTTTTCCCACATGGCCAAGAAGAACG                        |
| pGBKT7-Nsp9 <sub>L635A</sub>             | Nsp9L635A-F   | CGCCGTTCTTCGCGTCCATGTGGGA                            |
|                                          | Nsp9L635A-R   | TCCCACATGGACGCGAAGAACGGCG                            |
| pGBKT7-Nsp9 <sub>E611A</sub>             | Nsp9E611A-F   | TCCCGAATGGTTTGCAGAGCTTGTAG                           |
|                                          | Nsp9E611A-R   | TACAAGCTCTGCAAACCATTTCGGGATC                         |
| pGBKT7-Nsp9 <sub>E608A</sub>             | Nsp9E608A-F   | TATGATCCCGCATGGTTTGAAGAGC                            |
|                                          | Nsp9E608A-R   | GCTCTTCAAACCATGCGGGATCATA                            |
| pGBKT7-Nsp9 <sub>V615A</sub>             | Nsp9V615A-F   | GCTTGTAGCTGGGATAGCGCAGTG                             |
|                                          | Nsp9V615A-R   | CACTGCGCTATCCCAGCTACAAGC                             |
| pGBKT7-Nsp9 <sub>F628A</sub>             | Nsp9F628A-F   | AAGGACGGCTACAGTGCTCCCGGCC                            |
|                                          | Nsp9F628A-R   | GGCCGGGAGCACTGTAGCCGTCCTT                            |
| pGBKT7-Nsp9 <sub>F633A</sub>             | Nsp9F633A-F   | CCC GCCGGCCTTCTTGTCCATGTG                            |
|                                          | Nsp9F633A-R   | CACATGGACAAGAAGGCCGGCGGG                             |
| pGBKT7-Nsp9 <sub>608/611A</sub>          | Nsp9E608A-F   | TCGTGGATCCCTTAGCTGTGCTTGTTTAGAGTATGATCCCGC<br>ATGGTT |
| pGADT7-N <sub>R13A</sub>                 | NR13A-F       | CAAAAGAAAAAGGCGGGGAATGGCCAG                          |
|                                          | NR13A-R       | CTGGCCATTCCCCGCTTTTTCTTTTG                           |
| pGADT7-N <sub>T81A</sub>                 | NT81A-F       | TCGTGCATCCAGGCTGCCTTTAAC                             |
|                                          | NT81A-R       | GTTAAAGGCAGCCTGGATCGACGA                             |
| pGADT7-N Q85A                            | NQ85A-F       | TGCCTTTAACGCGGGCGCTGGAAC                             |
|                                          | NQ85A-R       | GTTCCAGCGCCCGCGTTAAAGGCA                             |
| pGADT7-N T101A                           | NT101A-F      | TCAGGTAGGATAAGTTACGCTGTGGAG                          |
|                                          | NT101A-R      | CTCCACAGCGTAACTTATCCTACCTGA                          |
| pGADT7-N P104A                           | NP104A-F      | CTGTGGAGGCTAGTTTGGCCAGC                              |
|                                          | NP104A-R      | TGCGTCGGCAAACCTAGCCTCCACAG                           |
| <b>Mutagenesis(CoIP)</b>                 |               |                                                      |
| pTriEx-Nsp9 <sub>E608A</sub>             | NcoINsp9-F    | TCGTGGATCCCTTAGCTGTGCTTGTTTAGAGTATGATCCCGC<br>ATGGTT |
|                                          | XhoINsp9-R    | TTGTCTCGAGCTCATGATTGGATCTGAG                         |
| pTriEx-Nsp9 <sub>E611A</sub>             | Nsp9E611A-F   | TCCCGAATGGTTTGCAGAGCTTGTAG                           |
|                                          | Nsp9E611A-R   | TACAAGCTCTGCAAACCATTTCGGGATC                         |
| pTriEx-Nsp9 <sub>E639A</sub>             | NcoINsp9His-F | TAGTCCATGGGAAGCTGTGCTTGTTTAGAG                       |

|                                        |                 |                                           |
|----------------------------------------|-----------------|-------------------------------------------|
|                                        | XhoIE639A-R     | TAGTCTCGAGCTCATGATTGGATCTGAGTTTTGCCAC     |
| pTriEx-Nsp9 <sub>E646A</sub>           | NcoINsp9His-F   | TAGTCCATGGGAAGCTGTGCTTGTTTAGAG            |
|                                        | XhoIE646A-R     | TAGTCTCGAGCGCATGATTGGATCTGAG              |
| pTriEx-Nsp9 <sub>E608A/E611A</sub>     | Nsp9E608A-F     | TAGACCATGGGAAGCTGTGCTTGTTTAGAGTATGATCCCCG |
|                                        |                 | ATGGTTTGCAGAGC                            |
|                                        | XhoINsp9-R      | TTGTCTCGAG CTCATGATTGGATCTGAG             |
| <b>Colocalization</b>                  |                 |                                           |
| PTriEx-mCherry-Nsp9                    | BamHINsp9-F     | TAATGGATCCAAGGAGCAGTGTTTAAACTG            |
|                                        | XhoINsp9-R      | TTGTCTCGAG CTCATGATTGGATCTGAG             |
| PTriEx-mCherry-Nsp9 <sub>1-552</sub>   | BamHINsp9-F     | TAATGGATCCAAGGAGCAGTGTTTAAACTG            |
|                                        | XhoINsp9-R5     | TACGCTCGAGTTACTCATGATTGGATCTGAG           |
| PTriEx-mCherry-Nsp9 <sub>599-646</sub> | BamHINsp9-F     | TGACGGATCCAGCTGTGCTTGTTTAGAG              |
|                                        | XhoINsp9-R      | TTGTCTCGAG CTCATGATTGGATCTGAG             |
| pTriEx-N-GFP                           | NcoIN-F         | TAATCCATGGCACCAAATAACAACGGCAAGC           |
|                                        | BamHIN-R        | TAATGGATCCCGCTGATGATGGCGCTGTG             |
| pTriEx-mCherry-DHX9                    | BamHIDHX9-F     | TCGCGGATCCATGGGTGACGTTAAAAATTTT           |
|                                        | HindIIIDHX9-R   | TGACAAGCTTTTAATAGCCGCCACCTCCTC            |
| <b>Over-expression</b>                 |                 |                                           |
| pTriEx-DHX9                            | BamHIDHX9r1-F   | TCGCGGATCCATGGGTGACGTTAAAAATTTTC          |
|                                        | HindIIIDHX9r2-R | TGACAAGCTTTTAATAGCCGCCACCTCCTC            |
|                                        | EcoRIDHX9r1-R   | GCCTCGATGAATTCAAAAGGAGTTTCC               |
|                                        | EcoRIDHX9r2-F   | TCAGGAATTCATCGAGGCTCTACTTAAG              |

Note: Restriction enzyme sites are underlined.

**Table A2. Primers sets for quantification of gRNA and sgmRNAs.**

| Primer name | Sequence (5'-3')          | Remark                       |
|-------------|---------------------------|------------------------------|
| Leader-F    | CACCTTGCTTCCGGAGTTG       | gRNA and sgmRNA2-7           |
| sgmRNA1-R   | GAGAGACCGTGACTGAGACATC    | gRNA                         |
| sgmRNA2-R   | CAGCCAACCGGCGATTGTGAA     | sgmRNA 2                     |
| sgmRNA3-R   | GCAAAGCGGGCATAACCGTGT     | sgmRNA 3                     |
| sgmRNA4-R   | ACGAAGTCTGATGCTGCGGTG     | sgmRNA 4                     |
| sgmRNA5-R   | CTGGCGTTGACGAGCACAGCA     | sgmRNA 5                     |
| sgmRNA6-R   | CATCACTGGCGTGTAGGTAATGGA  | sgmRNA 6                     |
| sgmRNA7-F   | CCCGGGTTGAAAAGCCTCGTGT    | total viral RNA              |
| sgmRNA7-R   | GGCTTCTCCGGGTTTTTCTTCCTA  | sgmRNA 7 and total viral RNA |
| GAPDH-F     | TGATGACATCAAGAAGGTGGTGAAG | internal control             |
| GAPDH-R     | TCCTTGAGGCCATGTGGGCCAT    | internal control             |

A

|                   |       | 1                                      | 50                                                  |
|-------------------|-------|----------------------------------------|-----------------------------------------------------|
| NVSL 97-7895 NSP9 | (1)   | GAV                                    | FKLLAASGLTRCGRGGLVVTETAVKIVKFNHRTFTLGPVNLKVA SEV    |
| TA-12 NSP9        | (1)   | ---                                    | FKLLAASGLTRCGRGGLVVTETAVKIVKFNHRTFTLGPVNLKVA SEV    |
| Olot/91 Nsp9      | (1)   | -TG                                    | FKLLAASGLTRCGRGGLVVTETAVKIIKMH SRTFTFGPELDLKVTV SEV |
| Consensus         | (1)   |                                        | FKLLAASGLTRCGRGGLVVTETAVKIVKFNHRTFTLGPVNLKVA SEV    |
|                   |       | 51                                     | 100                                                 |
| NVSL 97-7895 NSP9 | (51)  | ELKDAVEHNOHPVARPVDGGVVLIRSAVPSLIDVLI S | -GADASPKLLARH                                       |
| TA-12 NSP9        | (48)  | ELKDAVENNOHPVARPVDGGVVLIRSAVPSLIDVLI S | -GADASPKLLARH                                       |
| Olot/91 Nsp9      | (50)  | EVKKSTECGHAVVAN-ICSGVVLNRPHPESLIDVLI K | PGGLDTTIGLQPGH                                      |
| Consensus         | (51)  | ELKDAVENNOHPVARPVDGGVVLIRSAVPSLIDVLI S | GADASPKLLARH                                        |
|                   |       | 101                                    | 150                                                 |
| NVSL 97-7895 NSP9 | (100) | GPGNTGIDGTLWDFEAEATKEEIALSAQIIQACDI    | RRGDAPEI GLPYKLY                                    |
| TA-12 NSP9        | (97)  | GPGNTGIDGTLWDFEAEATKEEIALSAQIIQACDI    | RRGDAPEI GLPYKLY                                    |
| Olot/91 Nsp9      | (99)  | GAGNMVGGSLWDFETAPTKAELELSKQIIQACEV     | RRGDANLQGLPYKLY                                     |
| Consensus         | (101) | GPGNTGIDGTLWDFEAEATKEEIALSAQIIQACDI    | RRGDAPEI GLPYKLY                                    |
|                   |       | 151                                    | 200                                                 |
| NVSL 97-7895 NSP9 | (150) | PVRGNPERVKGVLQNTFRGDIPIYKTPSDTGS       | PVHAAACLT PNATPVT DGR                               |
| TA-12 NSP9        | (147) | PVRGNPERVKGVLQNTFRGDIPIYKTPSDTGS       | PVHAAACLT PNATPVT DGR                               |
| Olot/91 Nsp9      | (149) | PVRGDPERHKGRLINTRFGDLPYKTPQDTKSAI      | HAAACCLHPGAPVSDGR                                   |
| Consensus         | (151) | PVRGNPERVKGVLQNTFRGDIPIYKTPSDTGS       | PVHAAACLT PNATPVT DGR                               |
|                   |       | 201                                    | 250                                                 |
| NVSL 97-7895 NSP9 | (200) | SVLATTMPSGFELYVPTIPASVLDYLDSPDCPK      | QKLTGHCEDAALRDLS                                    |
| TA-12 NSP9        | (197) | SVLATTMPSGFELYVPTIPASVLDYLDSPDCPK      | QKLTGHCEDAALRDLS                                    |
| Olot/91 Nsp9      | (199) | STLGTTLQHGFEELYVPTIPYSVMHYLDSHP        | DTPEPMFKHGTSKAAE DLQ                                |
| Consensus         | (201) | SVLATTMPSGFELYVPTIPASVLDYLDSPDCPK      | QKLTGHCEDAALRDLS                                    |
|                   |       | 251                                    | 300                                                 |
| NVSL 97-7895 NSP9 | (250) | KYDLS TQGFVLPGLRLVRKYLFAHVGKCP         | PVHRPSTY PAKNSMAGINGN                               |
| TA-12 NSP9        | (247) | KYDLS TQGFVLPGLRLVRKYLFAHVGKCP         | PVHRPSTY PAKNSMAGINGN                               |
| Olot/91 Nsp9      | (249) | KYDLS TQGFVLPGLRLVRRFIFGHIGKAP         | PIFLPSTY PAKNSMAGINGN                               |
| Consensus         | (251) | KYDLS TQGFVLPGLRLVRKYLFAHVGKCP         | PVHRPSTY PAKNSMAGINGN                               |
|                   |       | 301                                    | 350                                                 |
| NVSL 97-7895 NSP9 | (300) | RFPTKDIQSVPEIDVLCQA VRENWQVTPCTL       | KKQYCGKKKTRT ILGTN                                  |
| TA-12 NSP9        | (297) | RFPTKDIQSVPEIDVLCQA VRENWQVTPCTL       | KKQYCGKKKTRT ILGTN                                  |
| Olot/91 Nsp9      | (299) | RFPTKDIQSVPEIDEMCARAVKENWQVTP          | CTLKKQYCSKPKTRT ILGTN                               |
| Consensus         | (301) | RFPTKDIQSVPEIDVLCQA VRENWQVTPCTL       | KKQYCGKKKTRT ILGTN                                  |
|                   |       | 351                                    | 400                                                 |
| NVSL 97-7895 NSP9 | (350) | NFIALAHRAALSGVTCGFMKKA FNSPIALG        | KNKFKELOTPVILGRLEADL                                |
| TA-12 NSP9        | (347) | NFIALAHRAALSGVTCGFMKKA FNSPIALG        | KNKFKELOTPVILGRLEADL                                |
| Olot/91 Nsp9      | (349) | NFIALAHRSAALSGVTCGFMKKA FNSPIALG       | KNKFKELOTPVILGRLEADL                                |
| Consensus         | (351) | NFIALAHRAALSGVTCGFMKKA FNSPIALG        | KNKFKELOTPVILGRLEADL                                |
|                   |       | 401                                    | 450                                                 |
| NVSL 97-7895 NSP9 | (400) | ASCDRSTPAI VRWFAANLYELACAEELP          | SYV LNCCHDL LVTQSGAVTK                              |
| TA-12 NSP9        | (397) | ASCDRSTPAI VRWFAANLYELACAEELP          | SYV LNCCHDL LVTQSGAVTK                              |
| Olot/91 Nsp9      | (399) | ASCDRSTPAI VRWFVANLYELACGEEY           | LPSYV LNCCHDL LVTQSGAVTK                            |
| Consensus         | (401) | ASCDRSTPAI VRWFAANLYELACAEELP          | SYV LNCCHDL LVTQSGAVTK                              |
|                   |       | 451                                    | 500                                                 |
| NVSL 97-7895 NSP9 | (450) | RGGLSGDPI TSVSNTIYSLVIYAQHMVLS         | YFKSGHPHGLLFLQDQLKFE                                |
| TA-12 NSP9        | (447) | RGGLSGDPI TSVSNTIYSLVIYAQHMVLS         | YFKSGHPHGLLFLQDQLKFE                                |
| Olot/91 Nsp9      | (449) | RGGLSGDPI TSVSNTIYSLVIYAQHMVLS         | ALKMGHEI GLKFLFLQDQLKFE                             |
| Consensus         | (451) | RGGLSGDPI TSVSNTIYSLVIYAQHMVLS         | YFKSGHPHGLLFLQDQLKFE                                |
|                   |       | 501                                    | 550                                                 |
| NVSL 97-7895 NSP9 | (500) | DMLKVQPLIVYSDDLVLVYAESPTMPNY           | HWWVEHLN LMLGFTDPKKTAIT                             |
| TA-12 NSP9        | (497) | DMLKVQPLIVYSDDLVLVYAESPTMPNY           | HWWVEHLN LMLGFTDPKKTAIT                             |
| Olot/91 Nsp9      | (499) | DLLEIQPLIVYSDDLVLVYAESPTMPNY           | HWWVEHLN LMLGFTDPKKTAVIT                            |
| Consensus         | (501) | DMLKVQPLIVYSDDLVLVYAESPTMPNY           | HWWVEHLN LMLGFTDPKKTIT                              |
|                   |       | 551                                    | 600                                                 |
| NVSL 97-7895 NSP9 | (550) | DSPSFLGCRITNGRQLVLPNRDRI LAALA         | YHMKASNVSEYYASAAA ILMDS                             |
| TA-12 NSP9        | (547) | DSPSFLGCRITNGRQLVLPNRDRI LAALA         | YHMKASNVSEYYASAAA ILMDS                             |
| Olot/91 Nsp9      | (549) | DKPSFLGCRITNGRQLVLPNRDRI LAALA         | YHMKASNVSEYYASAAA ILMDS                             |
| Consensus         | (551) | DSPSFLGCRITNGRQLVLPNRDRI LAALA         | YHMKASNVSEYYASAAA ILMDS                             |
|                   |       | 601                                    | 647                                                 |
| NVSL 97-7895 NSP9 | (600) | CACLEYDPEWFEE LVVGI AQCAR KDGY         | SFPGPPFFLSMWEKLR SNHE                               |
| TA-12 NSP9        | (597) | CACLEYDPEWFEE LVVGI AQCAR KDGY         | SFPGPPFFLSMWEKLR SNHE                               |
| Olot/91 Nsp9      | (599) | CACIDHDPEWFEE LVVGI AQCAR KDGY         | SFPGPPFFLSMWEKLR SNHE                               |
| Consensus         | (601) | CACLEYDPEWFEE LVVGI AQCAR KDGY         | SFPGPPFFLSMWEKLR SNHE                               |

B

|                |      | 1                             | 66                                                     |
|----------------|------|-------------------------------|--------------------------------------------------------|
| NVSL 97-7895 N | (1)  | MPNNNGKQKKK                   | ---RNGQPVNQLCQMLGKI I AQNQSRGKGF GKKIKNKNPEKPHFPLATEDD |
| TA-12 N        | (1)  | MPNNNGKQKKK                   | ---RNGQPVNQLCQMLGKI I AQNQSRGKGF GKKIKNKNPEKPHFPLATEDD |
| Olot/91 N      | (1)  | MAGKNQSKKKKSAAPM              | GNGQPVNQLCQMLGAMTKSQRQ---QPRGGQA KKKKPEKPHFPLAEDD      |
| Consensus      | (1)  | MPNNNGKQKKK                   | KNGQPVNQLCQMLGKI I AQNQSRGKGF GKKIKNKNPEKPHFPLATEDD    |
|                |      | 67                            | 131                                                    |
| NVSL 97-7895 N | (63) | VRHHFTPSE RQLCLSSIQTAFNQAGTCS | LSDSGRISYTVFSLPTHTVRLIRVITAS SA                        |
| TA-12 N        | (63) | VRHHFTPSE RQLCLSSIQTAFNQAGTCS | LSDSGRISYTVFSLPTHTVRLIRVITAS SA                        |
| Olot/91 N      | (64) | IRHHLTQTE RSLCLSIQTAFNQAGTAS  | LSSSGKVSQVEFMLEVAHTVRLIRVIT SASQAS                     |
| Consensus      | (67) | VRHHFTPSE RQLCLSSIQTAFNQAGTCS | LSDSGRISYTVFSLPTHTVRLIRVITAS SA                        |

Fig. A1. Alignment of Nsp9 (A) and N (B) protein sequences of three PRRSV strains.

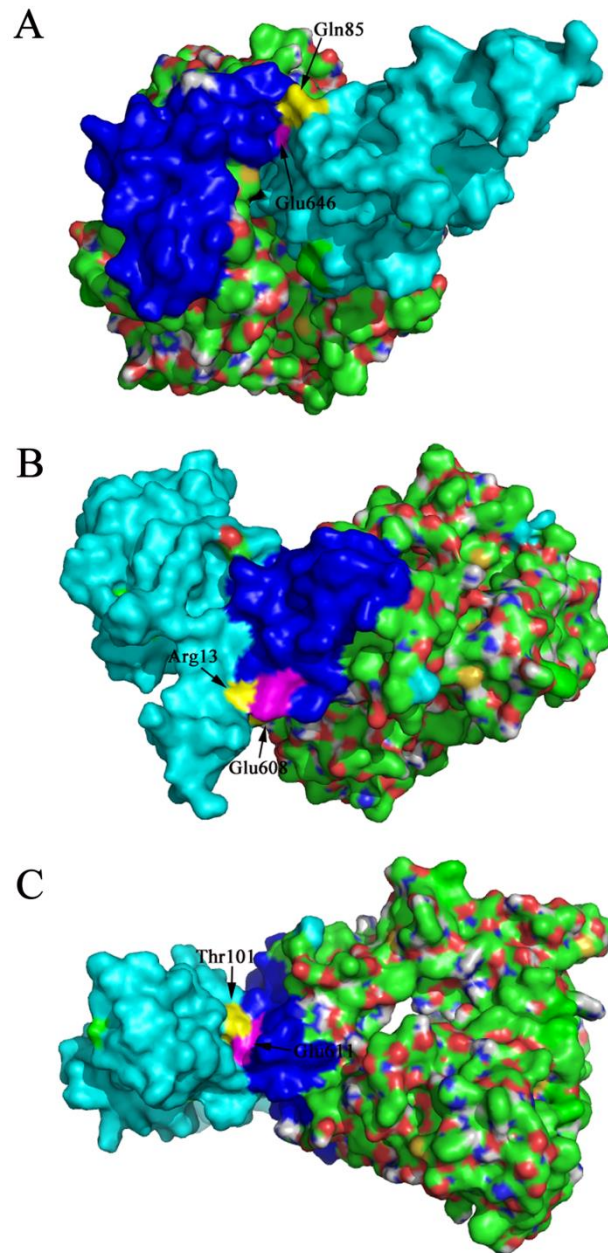

**Fig. A2. The predicted binding models for N-Nsp9 interaction.**

The simulated binding of N to Nsp9 was performed using database PRISM 2.0. The three predicted interaction models (A, B, C) are shown in surface format. Nsp9<sub>599-646</sub> fragment is colored blue and N protein in cyan. Predicted interface residues involved in the N-Nsp9 interaction are indicated by arrows.
